# Supplementary material
Source: publisher figshare collection journal article supplement (https://diabetesjournals.figshare.com/ndownloader/files/27433925)
Supplement: Supplementary file 1 [file 27433925]

# **American Diabetes Association Framework for Glycemic Control in Older Adults: Implications for Risk of Hospitalization and Mortality**

**Authors:** Mary R. Rooney, Olive Tang, Justin B. Echouffo Tcheugui, Pamela L. Lutsey, Morgan E. Grams, B. Gwen Windham, Elizabeth Selvin

## **Contents**

**Supplemental Table S1.** ICD-9 codes used to define American Diabetes Association comorbidities

**Supplemental Table S2.** Mortality and total hospitalizations in older adults with diabetes according to A1C categories, overall and by comorbid health status: The Atherosclerosis Risk in Communities (ARIC) Study, 2011 to 2018

**Supplemental Table S3.** Tabulation of health status categories according to glucose-lowering medication use, overall and in individuals with A1C below 7%

**Supplemental Table S4.** Mortality and total hospitalizations in older adults with diabetes restricted to insulin or sulfonylurea users, according to comorbid health status, overall and by A1C categories: The ARIC Study, 2011 to 2018

**Supplemental Figure S1.** Study participant flow chart

**Supplemental Figure S2.** Kaplan Meier survival curves of mortality in older adults with diabetes according to health status: The ARIC Study, 2011 to 2018

**Supplemental Figure S3.** Adjusted hazard ratio of the association of individual comorbidities with all-cause mortality: The ARIC Study, 2011 to 2018

**Supplemental Figure S4.** Adjusted incidence rate ratio of the association of individual comorbidities with total count of hospitalizations: The ARIC Study, 2011 to 2018

**Supplemental Table S1.** ICD-9 codes used to define American Diabetes Association comorbidities

| <b>Comorbidity</b>     | <b>ICD-9 Codes Used</b>                                                                                                                                                                                                                                                  | <b>CMS Claims Used</b> |
|------------------------|--------------------------------------------------------------------------------------------------------------------------------------------------------------------------------------------------------------------------------------------------------------------------|------------------------|
| Arthritis              | 714.X 715.X                                                                                                                                                                                                                                                              | Yes                    |
| Emphysema and COPD     | 416.8 416.9 490 491 492 493 494 495 496 500 501 502 503<br>504 505 506.4 508.1 508.8                                                                                                                                                                                     |                        |
| History of falls       | E880.0 E880.1 E880.9 E881.0 E881.1 E882 E883.0 E883.1<br>E883.2 E883.9 E884.0 E884.1 E884.2 E884.3 E884.4 E884.5<br>E884.6 E884.9 E885 E885.0 E885.1 E885.2 E885.3 E885.4<br>E885.9 E886.0 E886.9 E888 E888.0 E888.1 E888.8 E888.9<br>E968.1 E987.0 E987.1 E987.2 E987.9 | Yes                    |
| Hypoglycemia           | 250.3 250.8 251 251.1 251.2 270.3 775 775.6 962.3                                                                                                                                                                                                                        | Yes                    |
| Incontinence           | 788.3                                                                                                                                                                                                                                                                    | Yes                    |
| Chronic kidney disease | 585.3 585.4 585.5 585.6 585.9                                                                                                                                                                                                                                            |                        |

Abbreviations: ICD, International Classification of Diseases; CMS, Centers for Medicare and Medicaid;  
COPD, chronic obstructive pulmonary disease

**Supplemental Table S2.** Mortality and total hospitalizations in older adults with diabetes according to A1C categories, overall and by comorbid health status: The Atherosclerosis Risk in Communities (ARIC) Study, 2011 to 2018

| <b>A1C &amp; health status categories</b> |                      | <b>N total</b> | <b>All-Cause Mortality HR (95% CI)*</b> | <b>Total Hospitalizations IRR (95% CI)*</b> |
|-------------------------------------------|----------------------|----------------|-----------------------------------------|---------------------------------------------|
| A1C <7%                                   | Healthy              | 433            | 1 (Ref)                                 | 1 (Ref)                                     |
|                                           | Complex/Intermediate | 547            | 2.12 (1.46, 3.07)                       | 1.92 (1.61, 2.28)                           |
|                                           | Very Complex/Poor    | 337            | 4.60 (3.15, 6.73)                       | 3.40 (2.78, 4.15)                           |
|                                           |                      |                |                                         |                                             |
| A1C 7-<8%                                 | Healthy              | 101            | 1 (Ref)                                 | 1 (Ref)                                     |
|                                           | Complex/Intermediate | 143            | 1.90 (0.99, 3.63)                       | 2.79 (1.98, 3.92)                           |
|                                           | Very Complex/Poor    | 90             | 3.48 (1.77, 6.83)                       | 3.70 (2.53, 5.42)                           |
|                                           |                      |                |                                         |                                             |
| A1C ≥8%                                   | Healthy              | 48             | 1 (Ref)                                 | 1 (Ref)                                     |
|                                           | Complex/Intermediate | 76             | 1.21 (0.47, 3.14)                       | 3.02 (1.88, 4.85)                           |
|                                           | Very Complex/Poor    | 66             | 3.33 (1.33, 8.34)                       | 3.96 (2.39, 6.56)                           |
| <b>Alternative A1C Cut-points</b>         |                      |                |                                         |                                             |
| A1C <6%                                   | Healthy              | 181            | 1 (Ref)                                 | 1 (Ref)                                     |
|                                           | Complex/Intermediate | 219            | 2.76 (1.57, 4.86)                       | 1.88 (1.42, 2.49)                           |
|                                           | Very Complex/Poor    | 135            | 5.00 (2.76, 9.08)                       | 3.44 (2.48, 4.77)                           |
|                                           |                      |                |                                         |                                             |
| A1C ≥9%                                   | Healthy              | 24             | 1 (Ref)                                 | 1 (Ref)                                     |
|                                           | Complex/Intermediate | 36             | 4.40 (0.54, 36.10)                      | 4.08 (1.98, 8.39)                           |
|                                           | Very Complex/Poor    | 31             | 8.68 (1.10, 68.60)                      | 4.61 (2.06, 10.30)                          |

Abbreviations: HR, hazard ratio; IRR, incidence rate ratio

\* Adjusted for age, sex, race-center

**Supplemental Table S3.** Tabulation of health status categories according to glucose-lowering medication use, overall and in individuals with A1C below 7%

|                                                           | <b>Overall</b> | <b>No glucose-lowering medication</b> | <b>Non-insulin/sulfonylurea medication only</b> | <b>Insulin or sulfonylurea</b> |
|-----------------------------------------------------------|----------------|---------------------------------------|-------------------------------------------------|--------------------------------|
| <b>Health status categories</b>                           |                |                                       |                                                 |                                |
| Healthy                                                   | 582            | 257 (44.2)                            | 159 (27.3)                                      | 166 (28.5)                     |
| Complex/Intermediate                                      | 766            | 289 (37.7)                            | 192 (25.1)                                      | 285 (37.2)                     |
| Very Complex/Poor                                         | 493            | 166 (33.7)                            | 115 (23.3)                                      | 212 (43.0)                     |
|                                                           |                |                                       |                                                 |                                |
| <b>Health status categories in people with A1C &lt;7%</b> |                |                                       |                                                 |                                |
| Healthy                                                   | 433            | 238 (55.0)                            | 118 (27.3)                                      | 77 (17.8)                      |
| Complex/Intermediate                                      | 547            | 272 (49.7)                            | 146 (26.7)                                      | 129 (23.6)                     |
| Very Complex/Poor                                         | 337            | 148 (43.9)                            | 90 (26.7)                                       | 99 (29.4)                      |

N (row %)

**Supplemental Table S4.** Mortality and total hospitalizations in older adults with diabetes restricted to insulin or sulfonylurea users, according to comorbid health status, overall and by A1C categories: The ARIC Study, 2011 to 2018

| Insulin or Sulfonylurea Users (N=663)     |           | Mortality<br>HR (95% CI)* | Total<br>Hospitalizations<br>IRR (95% CI)* |
|-------------------------------------------|-----------|---------------------------|--------------------------------------------|
| <b>Health status categories*</b>          |           |                           |                                            |
| Healthy                                   |           | 1 (Ref)                   | 1 (Ref)                                    |
| Complex/Intermediate                      |           | 1.96 (1.20, 3.20)         | 2.71 (2.10, 3.50)                          |
| Very Complex/Poor                         |           | 3.84 (2.34, 6.30)         | 3.80 (2.89, 5.00)                          |
|                                           |           |                           |                                            |
| <b>Health status &amp; A1C categories</b> |           |                           |                                            |
| Healthy                                   | A1C <7%   | 1 (Ref)                   | 1 (Ref)                                    |
|                                           | A1C 7-<8% | 1.13 (0.42, 3.07)         | 1.25 (0.74, 2.12)                          |
|                                           | A1C ≥8%   | 1.72 (0.55, 5.35)         | 1.33 (0.73, 2.43)                          |
|                                           |           |                           |                                            |
| Complex/Intermediate                      | A1C <7%   | 1 (Ref)                   | 1 (Ref)                                    |
|                                           | A1C 7-<8% | 1.04 (0.61, 1.77)         | 1.10 (0.79, 1.53)                          |
|                                           | A1C ≥8%   | 1.18 (0.63, 2.20)         | 1.38 (0.95, 2.01)                          |
|                                           |           |                           |                                            |
| Very Complex/Poor                         | A1C <7%   | 1 (Ref)                   | 1 (Ref)                                    |
|                                           | A1C 7-<8% | 0.98 (0.57, 1.68)         | 0.77 (0.53, 1.11)                          |
|                                           | A1C ≥8%   | 1.59 (0.91, 2.78)         | 0.91 (0.61, 1.35)                          |

Abbreviations: HR, hazard ratio; IRR, incidence rate ratio

\* Adjusted for age, sex, race-center

**Supplemental Figure S1.** Study participant flow chart

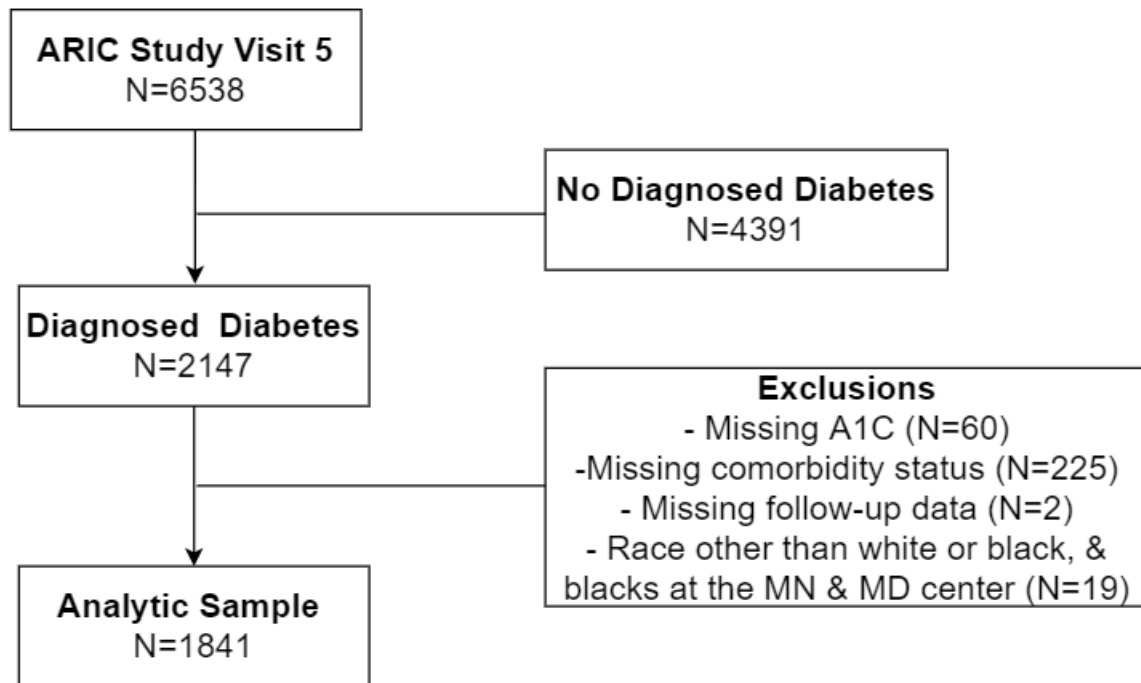

**Supplemental Figure S2.** Kaplan Meier survival curves of mortality in older adults with diabetes according to health status: The ARIC Study, 2011 to 2018

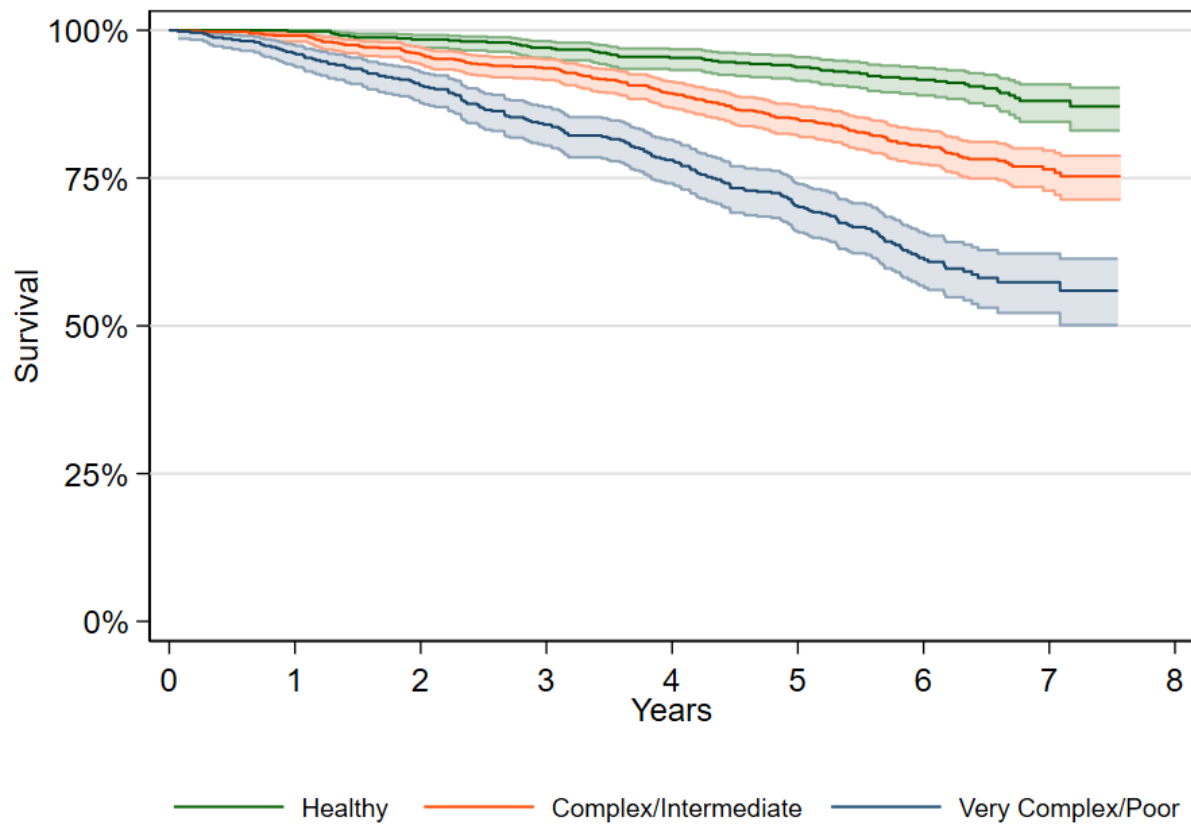

**Supplemental Figure S3.** Adjusted hazard ratio of the association of individual comorbidities with all-cause mortality: The ARIC Study, 2011 to 2018

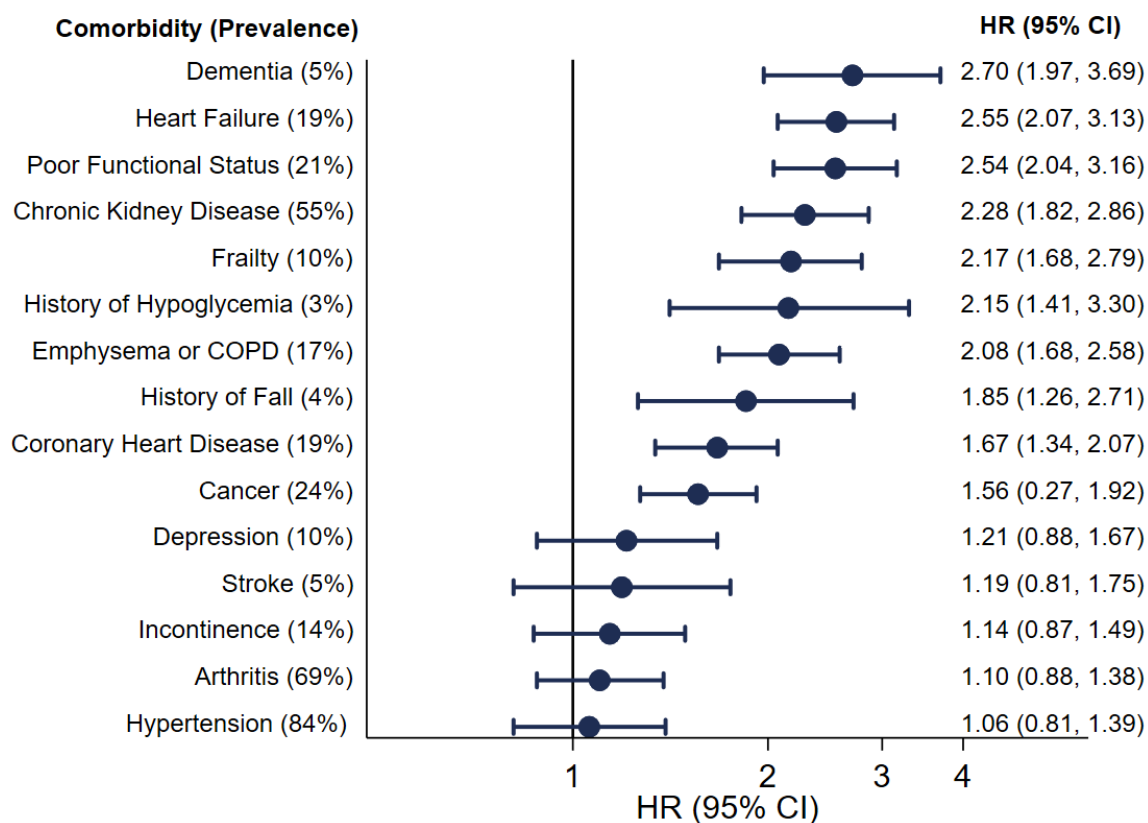

Abbreviations: HR, hazard ratio; COPD, chronic obstructive pulmonary disease. HR adjusted for age, sex, race-center



**Supplemental Figure S4.** Adjusted incidence rate ratio of the association of individual comorbidities with total count of hospitalizations: The ARIC Study, 2011 to 2018

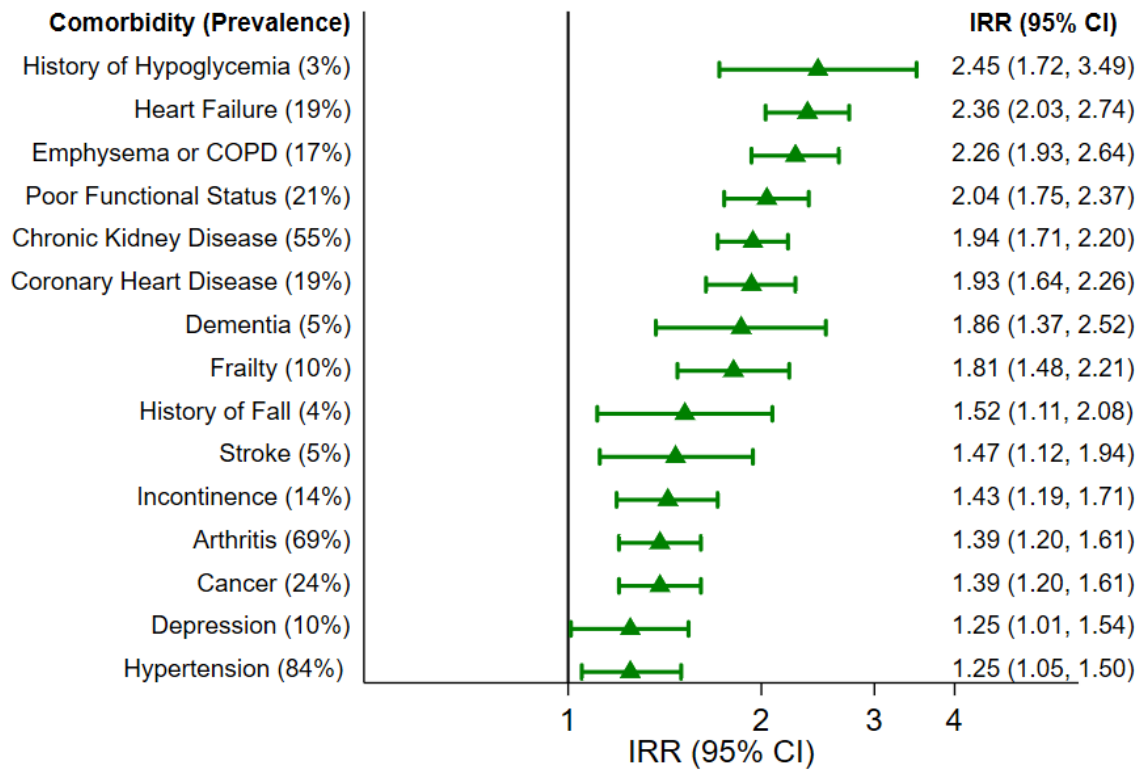

Abbreviations: IRR, incidence rate ratio; COPD, chronic obstructive pulmonary disease. IRR adjusted for age, sex, race-center
